## CORRECTION

# Correction: Men's knowledge, attitude, and barriers towards emergency contraception: A facility based cross-sectional study at King Saud University Medical City

Syed Irfan Karim, Farhana Irfan, Hussain Saad, Mohammed Alqhtani, Abdulmalik Alsharhan, Ahmed Alzahrani, Feras Alhawwas, Saud Alatawi, Mohammed Alassiri, Abdullah M. A. Ahmed

The sixth author's name is spelled incorrectly. The correct name is: Ahmed Alzahrani. The correct citation is: Karim SI, Irfan F, Saad H, Alqhtani M, Alsharhan A, Alzahrani A, et al. (2021) Men's knowledge, attitude, and barriers towards emergency contraception: A facility based cross-sectional study at King Saud University Medical City. PLoS ONE 16(4): e0249292. <https://doi.org/10.1371/journal.pone.0249292>

## Reference

1. Karim SI, Irfan F, Saad H, Alqhtani M, Alsharhan A, Alzhrani A, et al. (2021) Men's knowledge, attitude, and barriers towards emergency contraception: A facility based cross-sectional study at King Saud University Medical City. PLoS ONE 16(4): e0249292. <https://doi.org/10.1371/journal.pone.0249292> PMID: 33901184

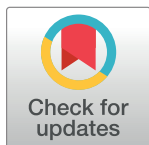

## OPEN ACCESS

**Citation:** Karim SI, Irfan F, Saad H, Alqhtani M, Alsharhan A, Alzahrani A, et al. (2024) Correction: Men's knowledge, attitude, and barriers towards emergency contraception: A facility based cross-sectional study at King Saud University Medical City. PLoS ONE 19(5): e0303464. <https://doi.org/10.1371/journal.pone.0303464>

**Published:** May 2, 2024

**Copyright:** © 2024 Karim et al. This is an open access article distributed under the terms of the [Creative Commons Attribution License](https://creativecommons.org/licenses/by/4.0/), which permits unrestricted use, distribution, and reproduction in any medium, provided the original author and source are credited.
